# Supplementary material
Source: PubMed Central journal article supplement (PMC3851905)
Supplement: jcbfm2013155x1.pdf [file jcbfm2013155x1.pdf]

## SUPPLEMENTARY MATERIALS

| <b>Supplementary TABLE 1: List of primer sequences for PCR.</b> |                              |                         |                             |               |
|-----------------------------------------------------------------|------------------------------|-------------------------|-----------------------------|---------------|
| <b>MOUSE</b>                                                    | <b>Primer Sequence 5'@3'</b> | <b>Accession number</b> | <b>Amplicon length (bp)</b> | <b>Region</b> |
| Arg-1                                                           | F: TTGCGAGACGTAGACCCTGG      | NM_007482.3             | 160                         | Exon 5        |
|                                                                 | R: CAAAGCTCAGGTGAATCGGC      |                         |                             | Exon 7        |
| COX2                                                            | F: CCACTTCAAGGGAGTCTGGA      | NM_011198.3             | 187                         | Exon 3        |
|                                                                 | R: AGTCATCTGCTACGGGAGGA      |                         |                             | Exon 4        |
| CXCL1                                                           | F: CCGAAGTCATAGCCACTCAA      | NM_008176.3             | 128                         | Exon 2/3      |
|                                                                 | R: GCAGTCTGTCTTCTTTCCGTTAC   |                         |                             | Exon 4        |
| CX3CL1                                                          | F: TGGCTTTGCTCATCCGCTATCAG   | NM_009142.3             | 82                          | Exon 2        |
|                                                                 | R: CGTCTGTGCTGTGTCGTCTCC     |                         |                             | Exon 3        |
| ICAM-1                                                          | F: CCGTGCCAAGCCCACGCTAC      | NM_010493.2             | 300                         | Exon 1        |
|                                                                 | R: GCGGAAGCGGACGACTGCAC      |                         |                             | Exon 2        |
| IGF-1                                                           | F: GTGGACCGAGGGGCTTTACTTC    | NM_010512.4             | 246                         | Exon 1 or 2   |
|                                                                 | R: TTTGCAGCTTCGTTTTCTGTTTG   |                         |                             | Exon2 or 3    |
| IL-1 $\beta$                                                    | F: GAAGAGCCCATCCTCTGTGA      | NM_008361.3             | 96                          | Exon 4-5      |
|                                                                 | R: TTCATCTCGGAGCCTGTAGTG     |                         |                             | Exon 5        |
| IL1RA                                                           | F: AACCACCAGGGCATCACATA      | NM_001159562.1          | 150                         | Exon 5        |
|                                                                 | R: CCTCTTGCCGACATGGAATA      |                         |                             | Exon 5        |
| IL-6                                                            | F: GATGGATGCTACCAAAGTGGGA    | NM_031168.1             | 142                         | Exon 3        |
|                                                                 | R: TCTGAAGGACTCTGGCTTTG      |                         |                             | Exon 4        |
| IL-10R                                                          | F: CCTTCCTATGTGTGGTTTGAAGCC  | NM_008348.2             | 290                         | Exon 1        |
|                                                                 | R: TCATCCACTGTGAAGCGAGTCTC   |                         |                             | Exon 2        |
| iNOS                                                            | F: CAGCTGGGCTGTACAAACCTT     | NM_010927.3             | 95                          | Exon 17       |
|                                                                 | R: CATTGAAGTGAAGCGTTTCG      |                         |                             | Exon 18       |
| MCP-1                                                           | F: AGGTGTCCCAAAGAAGCTGTAG    | NM_011333.3             | 90                          | Exon 2        |
|                                                                 | R: AATGTATGTCTGGACCCATTCC    |                         |                             | Exon 3        |
| MIP-1 $\alpha$                                                  | F: TTCTGCTGACAAAGCTCACCCCT   | NM_011337.2             | 116                         | Exon 1        |
|                                                                 | R: ATGGCGCTGAGAAGACTTGGT     |                         |                             | Exon 1        |
| MIP-2a                                                          | F: GAACAAAGGCAAGGCTAACTGA    | NM_009140.2             | 204                         | Exon 3/4      |
|                                                                 | R: AACATAACAACATCTGGGCAAT    |                         |                             | Exon 4        |
| MMP-9                                                           | F:CTTCTCTGGACGTCAAATGTG      | NM_013599.2             | 276                         | Exon 10-11    |
|                                                                 | R: AGAAGAATTTGCCATGGCAG      |                         |                             | Exon 13       |
| TGF- $\beta$                                                    | F: TGCTTCAGCTCCACAGAGAA      | NM_011577.1             | 155                         | Exon 5-6      |
|                                                                 | R: TACTGTGTGTCCAGGCTCCA      |                         |                             | Exon 6        |
| TLR-4                                                           | F: TGTTCTTCTCCTGCCTGACA      | NM_021297.2             | 108                         | Exon 1        |
|                                                                 | R: TGTCATCAGGGACTTTGCTG      |                         |                             | Exon 2        |
| TNF- $\alpha$                                                   | F: GGGGCCACCACGCTCTTCTGTC    | NM_013693               | 155                         | Exon 1        |
|                                                                 | R: TGGGCTACGGGCTTGCACTCG     |                         |                             | Exon 3        |
| SDHA                                                            | F: TGGGGAGTGCCGTGGTGTCA      | NM_023281.1             | 154                         | Exon 6        |
|                                                                 | R: CATGGCTGTGCCGTCCCCTG      |                         |                             | Exon 7        |
| YM-1                                                            | F: CAGGTCTGGCAATCTTCTGAA     | NM_009892.2             | 197                         | Exon 1-2      |
|                                                                 | R: GTCTTGCTCATGTGTGTAAGTGA   |                         |                             | Exon 3        |

## Supplementary Fig. 1

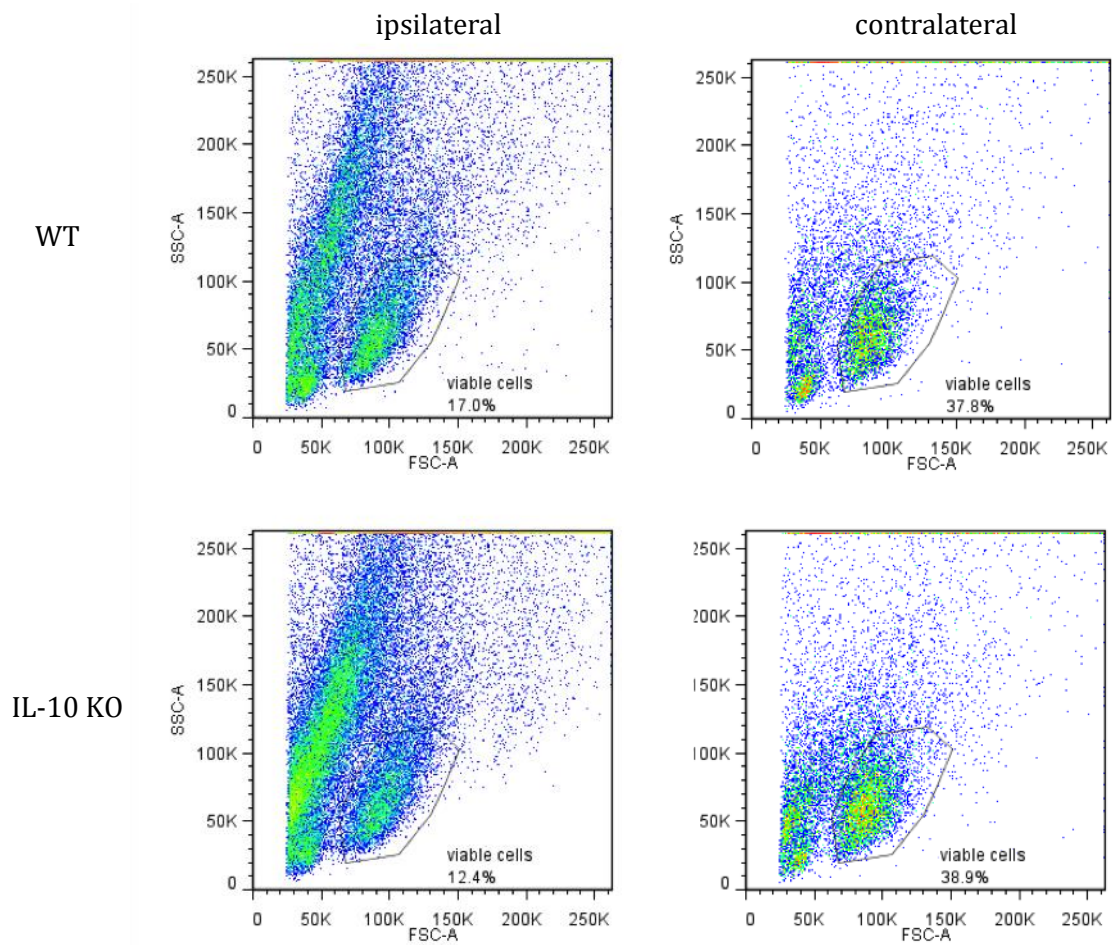

*Legend to Supplementary Fig. 1: Flow cytometry of brain tissue cells: Cells were morphologically identified by forward and side scatter (FSC-A vs SSC-A) parameters. Viable cells were further analyzed by exclusion of doublets and by antigen positivity on CD11b, CD45, F4/80 and Ly6G. Images illustrate representative samples of the ipsilateral and contralateral hemispheres 4 days after pMCAO in WT mice and IL-10 KO mice.*

## Supplementary Fig. 2

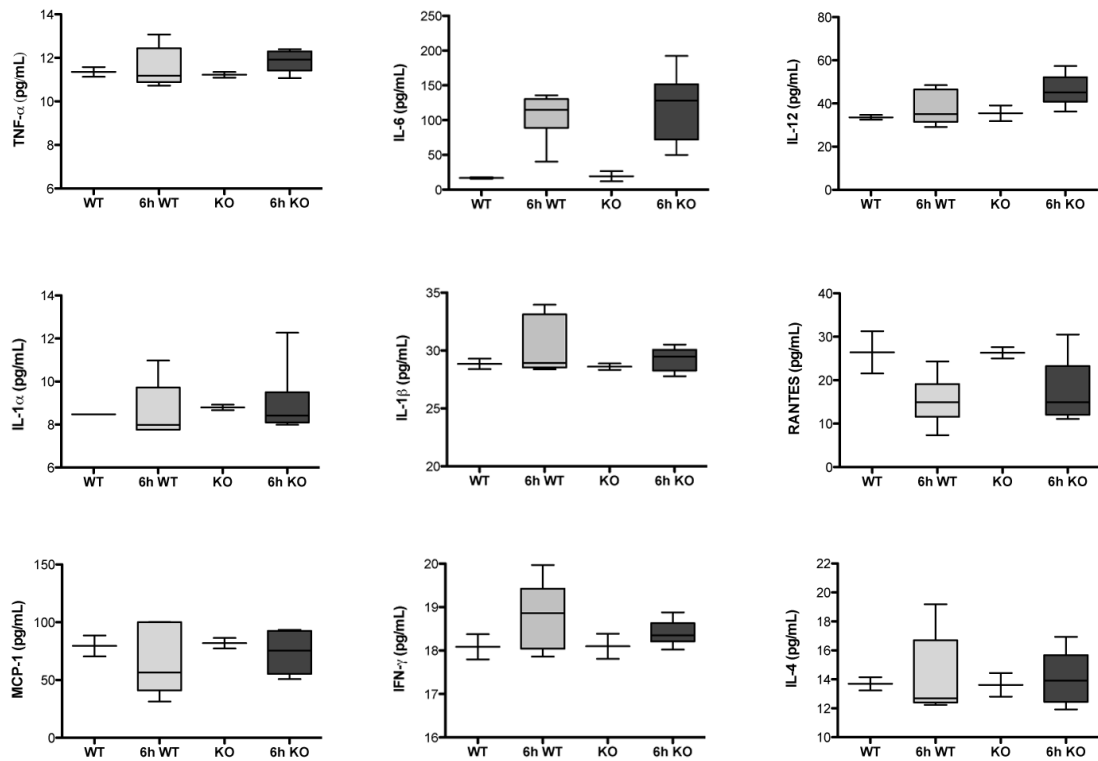

*Legend to Supplementary Fig. 2: Plasma cytokines and chemokines in WT and IL-10 KO mice housed under SPF conditions. Plasma was obtained from naïf non-ischemic mice (WT and KO, n=2 per group) and from ischemic mice at 6 hours after pMCAO (6h WT and 6h KO, n=6 per group). Values are expressed as pg/mL of plasma. Although a trend for higher IL-12 concentrations is observed in IL-10 KO mice after pMCAO, group differences for all the molecules shown in the graphs are not statistically significant.*

### Supplementary Fig. 3

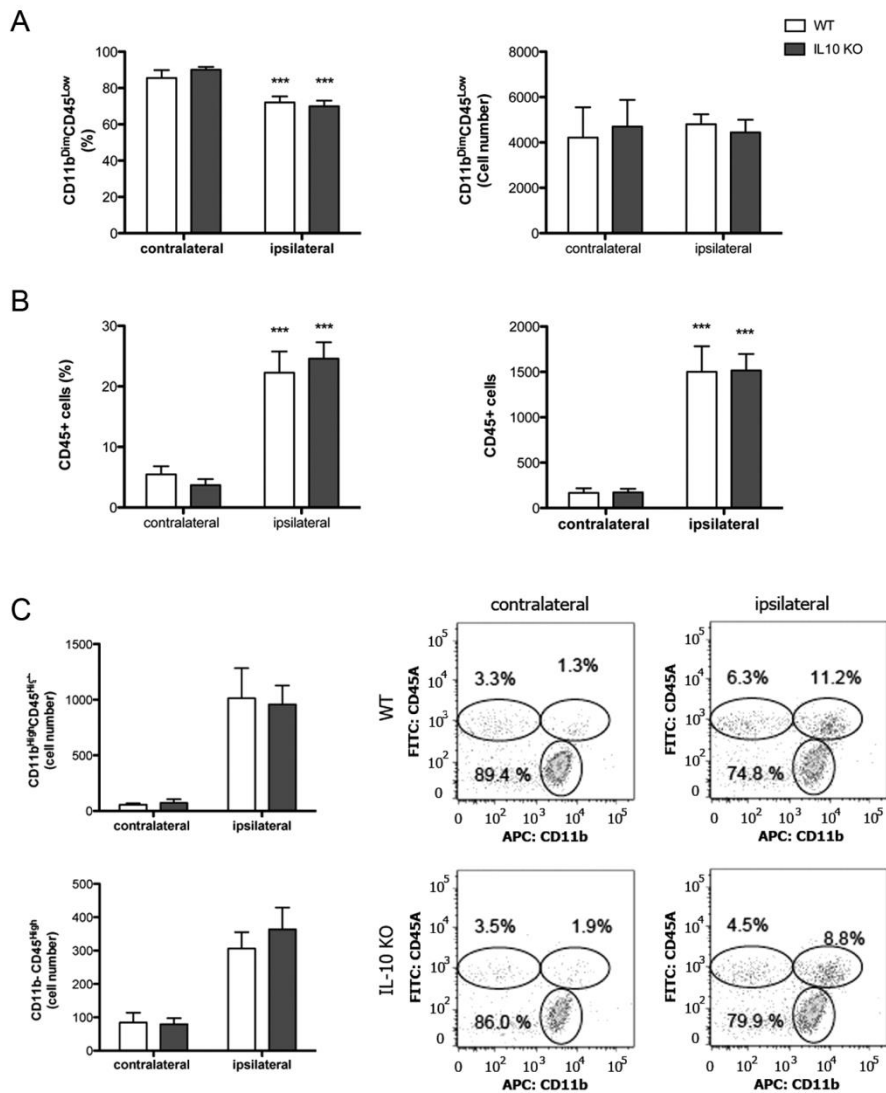

*Legend to Supplementary Fig. 3: Myeloid cells in the ischemic tissue 4 days after pMCAO.* Flow cytometry of brain tissue showed that the percentage of microglia cells (CD11b<sup>Dim</sup>CD45<sup>Low</sup>) decrease in the ipsilateral cortex 4 days after pMCAO (A), due to increases in the numbers of CD45<sup>+</sup> cells demonstrating the presence of leukocytes in the ischemic tissue (B). However, no differences are observed between WT and IL-10 KO mice. (C) Ischemia increases the numbers of infiltrated (CD45<sup>High</sup>) leukocytes, both CD11b<sup>High</sup>CD45<sup>High</sup> myeloid cells and CD11b-CD45<sup>High</sup> lymphocytes, but the effects are similar in both genotypes. Flow cytometry diagrams shown in the right panels correspond to one representative sample per group, out of n=5 per group, \*\*\* p<0.001 versus the corresponding contralateral non-ischemic cortex.

## Supplementary Fig. 4

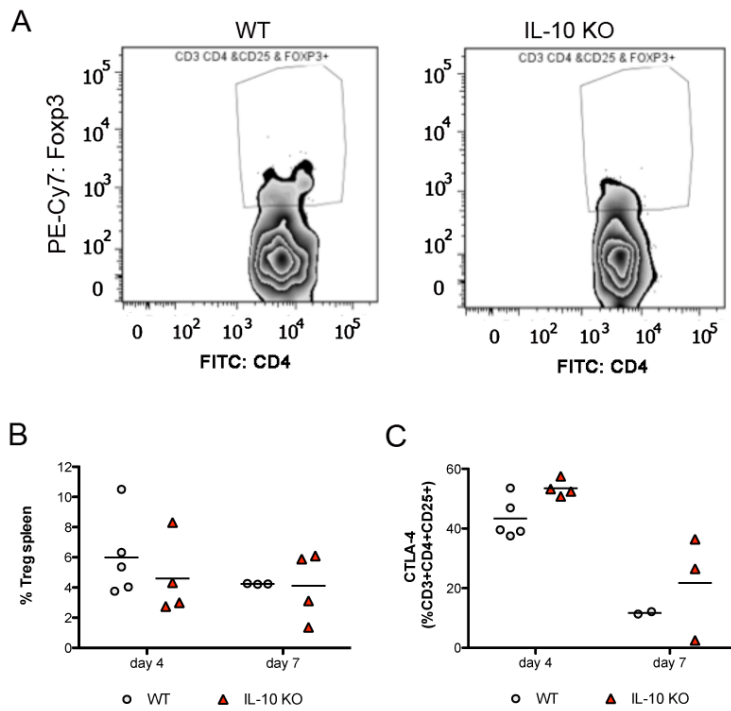

*Legend to Supplementary Fig. 4: Flow cytometry of Treg from the spleen of WT and IL-10 KO mice. A) Representative dot plots of Treg expression in splenocytes from WT and IL-10 KO mice 7 days after pMCAO. Single viable cells were plotted by FoxP3 versus CD4 expression. B) Frequency of Foxp3+ splenocytes in WT and IL-10 KO mice analyzed by flow cytometry 4 and 7 days after pMCAO. C) Frequency of CTLA-4+ (CD152) splenocytes in WT and IL-10 KO mice analyzed by flow cytometry 4 and 7 days after stroke. Points in (B) and (C) represent values from individual subject. No significant differences between groups were found.*

## SUPPLEMENTARY METHODS

*Microglia cultures:* The cerebral cortices of 1-day-old neonatal mice (C57BL/6, Charles-River, Lyon, France) (n=10-12) were dissected out. After mechanical dissociation the tissue was chemically dissociated by incubation with trypsin-EDTA (#25200-05625, Gibco-BRL, Invitrogen, Paisley, UK) for 25 min at 37 °C in a shaker. Then samples were placed in 20 mL DMEM/F12 (#31330-038, GIBCO-BRL) (1:1) containing 10 % fetal bovine serum (FBS) (#10500-064, GIBCO-BRL) and DNase I (6,000 Units) (D-5025-150KU, Sigma-Aldrich, St. Louis, MO, USA). Cells were suspended to a final density of 350,000 cells/mL with supplemented DMEM/F12 (1:1) medium containing 20 % FBS and antibiotics (0.4 % penicillin/streptomycin #15140-122, GIBCO-BRL) and were seeded on 6-well poly-lysine coated plates. Cells were placed in an incubator at 37 °C in an atmosphere containing 95 % atmospheric air and 5% CO<sub>2</sub> until they reached confluence (approximately after 16 days in vitro (DIV)). The culture medium was changed and cells were kept in culture for 3 days more. At this stage the culture medium was removed and it was kept at 37 °C (this is the conditioned medium to be used in a later step) and cells were mildly trypsinized to induce detachment of the astroglial layer. Cells remaining attached to the wells are highly enriched in microglia (98 %). Microglial cells were then kept in fresh medium containing 50 % of the astroglia-conditioned medium obtained above and were used for treatments the following day. Cells were subjected to ischemic conditions for 3 hours by placing them in an anoxia incubator (GalaxyR/RS Biotech, New Brunswick, Eppendorf, Enfield, CT, USA) containing an atmosphere of 95 % N<sub>2</sub>, and 5 % CO<sub>2</sub> at 37 °C. After this time, cells were kept for 3 hours more under normoxic conditions. Other cells were exposed to 10 ng/mL lipopolysaccharide (LPS) (Escherichia coli 055:B5) (Sigma-Aldrich) for 6 hours. For IL-10 treatment, 10 ng/mL recombinant murine IL-10 (#210-10, PreproTech, Rocky Hill, NJ, USA) was added to the cell cultures 30 min before the above challenges.
